# Supplementary material for: Influence of molecular weight on polymorphs and temperature-induced structure evolution of regioregular poly(3-dodecylthiophene)
Source: Royal Society of Chemistry journal article supplement (doi:10.1039/c3py01282d), 2013-12-10
Supplement: c3py01282d.pdf [file c3py01282d.pdf]

## Supplementary Information

### Influence of Molecular Weight on Polymorphs and Temperature-Induced Structure Evolution of Regioregular Poly(3-dodecylthiophene)

Yan Guo, Lei Wang, Yuanyuan Han, Yanhou Geng and Zhaohui Su\*

State Key Laboratory of Polymer Physics and Chemistry, Changchun Institute of Applied Chemistry, Chinese Academy of Sciences, 5625 Renmin Street, Changchun 130022, People's Republic of China

\*Corresponding author: zhsu@ciac.ac.cn

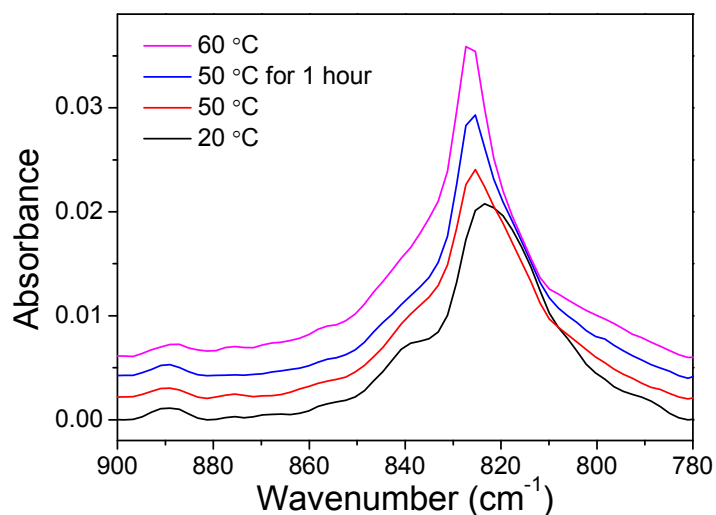

**Figure S1.** FTIR spectra in the C<sub>β</sub>-H out-of-plane bending region of DDT-5K films upon rapid heating (130 °C/min) to 60 °C and 50 °C, respectively, and of the latter annealed at 50 °C for 1 hour. These films were recrystallized from melt to 20 °C at a rate of 10 °C/min, which contained both form I and form II as revealed by the FTIR spectrum. Upon heating to higher temperatures, the 826 cm<sup>-1</sup> component (form II) rises at the expense of the 820 cm<sup>-1</sup> component (form I), revealing the transformation of form I to form II.
